# Supplementary material for: A Nucleotide Signature for the Identification of Angelicae Sinensis Radix (Danggui) and Its Products
Source: PubMed Central journal article supplement (PMC5054691; doi:10.1038/srep34940), 2016-10-07
Supplement: srep34940-s1.pdf [file srep34940-s1.pdf]

# A Nucleotide Signature for the Identification of *Angelicae Sinensis Radix* (Danggui) and Its Products

Xiaoyue Wang<sup>1</sup>, Yang Liu<sup>1</sup>, Lili Wang<sup>1</sup>, Jianping Han<sup>1\*</sup>, Shilin Chen<sup>2\*</sup>

1. Institute of Medicinal Plant Development, Chinese Academy of Medicinal Science & Peking Union Medicinal College, Beijing 100193, P.R. China

2. Institute of Chinese Materia Medica, China Academy of Chinese Medical Sciences,  
Beijing 100700, P.R. China

## Supplementary Table S1 Sampling information of *Angelica sinensis* and its adulterants

| Sample No. | Latin Name of Original Species | Latin Name of Medicinal materials | Sample type      | Collection Site          |
|------------|--------------------------------|-----------------------------------|------------------|--------------------------|
| DG01       | <i>Angelica sinensis</i>       | <i>Angelicae sinensis radix</i>   | Medicinal slices | Beijing City             |
| DG07       | <i>Angelica sinensis</i>       | <i>Angelicae sinensis radix</i>   | Whole Radix      | Anhui Bozhou Herb Market |
| DG08       | <i>Angelica sinensis</i>       | <i>Angelicae sinensis radix</i>   | Whole Radix      | Anhui Bozhou Herb Market |
| DG09       | <i>Angelica sinensis</i>       | <i>Angelicae sinensis radix</i>   | Medicinal slices | Anhui Bozhou Herb Market |
| DG10       | <i>Angelica sinensis</i>       | <i>Angelicae sinensis radix</i>   | Medicinal slices | Anhui Bozhou Herb Market |
| DG11       | <i>Angelica sinensis</i>       | <i>Angelicae sinensis radix</i>   | Medicinal slices | Anhui Bozhou Herb Market |
| DG12       | <i>Angelica sinensis</i>       | <i>Angelicae sinensis radix</i>   | Medicinal slices | Anhui Bozhou Herb Market |
| DG13       | <i>Angelica sinensis</i>       | <i>Angelicae sinensis radix</i>   | Medicinal slices | Anhui Bozhou Herb Market |
| DG14       | <i>Angelica sinensis</i>       | <i>Angelicae sinensis radix</i>   | Medicinal slices | Anhui Bozhou Herb Market |
| DG15       | <i>Angelica sinensis</i>       | <i>Angelicae sinensis radix</i>   | Medicinal slices | Anhui Bozhou Herb Market |
| DG16       | <i>Angelica sinensis</i>       | <i>Angelicae sinensis radix</i>   | Medicinal slices | Anhui Bozhou Herb Market |
| DG17       | <i>Angelica sinensis</i>       | <i>Angelicae sinensis radix</i>   | Medicinal slices | Anhui Bozhou Herb Market |
| DG18       | <i>Angelica sinensis</i>       | <i>Angelicae sinensis radix</i>   | Medicinal slices | Anhui Bozhou Herb Market |
| DG19       | <i>Angelica sinensis</i>       | <i>Angelicae sinensis radix</i>   | Medicinal slices | Anhui Bozhou Herb Market |
| DG20       | <i>Angelica sinensis</i>       | <i>Angelicae sinensis radix</i>   | Medicinal slices | Anhui Bozhou Herb Market |
| DG21       | <i>Angelica sinensis</i>       | <i>Angelicae sinensis radix</i>   | Medicinal slices | Anhui Bozhou Herb Market |
| DG22       | <i>Angelica sinensis</i>       | <i>Angelicae sinensis radix</i>   | Medicinal slices | Anhui Bozhou Herb Market |
| DG23       | <i>Angelica sinensis</i>       | <i>Angelicae sinensis radix</i>   | Medicinal slices | Anhui Bozhou Herb Market |
| DG24       | <i>Angelica sinensis</i>       | <i>Angelicae sinensis radix</i>   | Medicinal slices | Anhui Bozhou Herb Market |
| DG25       | <i>Angelica sinensis</i>       | <i>Angelicae sinensis radix</i>   | Medicinal slices | Anhui Bozhou Herb Market |
| DG26       | <i>Angelica sinensis</i>       | <i>Angelicae sinensis radix</i>   | Medicinal slices | Anhui Bozhou Herb Market |
| DG27       | <i>Angelica sinensis</i>       | <i>Angelicae sinensis radix</i>   | Medicinal slices | Anhui Bozhou Herb Market |
| DG28       | <i>Angelica sinensis</i>       | <i>Angelicae sinensis radix</i>   | Medicinal slices | Anhui Bozhou Herb Market |

|            |                          |                          |                  |                                               |
|------------|--------------------------|--------------------------|------------------|-----------------------------------------------|
| DG29       | <i>Angelica sinensis</i> | Angelicae sinensis radix | Medicinal slices | Anhui Bozhou Herb Market                      |
| DG30       | <i>Angelica sinensis</i> | Angelicae sinensis radix | Medicinal slices | Anhui Bozhou Herb Market                      |
| DG31       | <i>Angelica sinensis</i> | Angelicae sinensis radix | Medicinal slices | Anhui Bozhou Herb Market                      |
| DG32       | <i>Angelica sinensis</i> | Angelicae sinensis radix | Medicinal slices | Anhui Bozhou Herb Market                      |
| DG33       | <i>Angelica sinensis</i> | Angelicae sinensis radix | Medicinal slices | Anhui Bozhou Herb Market                      |
| DG34       | <i>Angelica sinensis</i> | Angelicae sinensis radix | Medicinal slices | Anhui Bozhou Herb Market                      |
| DG35       | <i>Angelica sinensis</i> | Angelicae sinensis radix | Medicinal slices | Anhui Bozhou Herb Market                      |
| DG36       | <i>Angelica sinensis</i> | Angelicae sinensis radix | Medicinal slices | Anhui Bozhou Herb Market                      |
| DG37       | <i>Angelica sinensis</i> | Angelicae sinensis radix | Medicinal slices | Anhui Bozhou Herb Market                      |
| DG38       | <i>Angelica sinensis</i> | Angelicae sinensis radix | Medicinal slices | Anhui Bozhou Herb Market                      |
| DG39       | <i>Angelica sinensis</i> | Angelicae sinensis radix | Medicinal slices | Anhui Bozhou Herb Market                      |
| DG40       | <i>Angelica sinensis</i> | Angelicae sinensis radix | Whole Radix      | Anhui Bozhou Herb Market                      |
| DG47       | <i>Angelica sinensis</i> | Angelicae sinensis radix | Medicinal slices | Min Country, Gansu Province                   |
| DG48       | <i>Angelica sinensis</i> | Angelicae sinensis radix | Medicinal slices | Beijing City                                  |
| DG49       | <i>Angelica sinensis</i> | Angelicae sinensis radix | Medicinal slices | Guangzhou City, Guangdong Province            |
| DGF10      | <i>Angelica sinensis</i> | Angelicae sinensis radix | Powder           | Beijing City                                  |
| FDC295     | <i>Angelica sinensis</i> | Angelicae sinensis radix | Powder           | National Institutes for food and drug Control |
| PS1205MT01 | <i>Angelica sinensis</i> | Angelicae sinensis radix | Original plant   | Dingxi Country, Gansu Province                |
| YC0133MT01 | <i>Angelica sinensis</i> | Angelicae sinensis radix | Medicinal slices | Dingxi Country, Gansu Province                |
| YC0133MT02 | <i>Angelica sinensis</i> | Angelicae sinensis radix | Medicinal slices | Hebei Anguo Herb Market                       |
| YC0133MT03 | <i>Angelica sinensis</i> | Angelicae sinensis radix | Medicinal slices | Hebei Anguo Herb Market                       |
| YC0133MT04 | <i>Angelica sinensis</i> | Angelicae sinensis radix | Medicinal slices | Hebei Anguo Herb Market                       |
| YC0133MT05 | <i>Angelica sinensis</i> | Angelicae sinensis radix | Medicinal slices | Anhui Bozhou Herb Market                      |
| YC0133MT06 | <i>Angelica sinensis</i> | Angelicae sinensis radix | Medicinal slices | Beijing City                                  |
| YC0133MT07 | <i>Angelica sinensis</i> | Angelicae sinensis radix | Medicinal slices | Beijing City                                  |
| YC0133MT08 | <i>Angelica sinensis</i> | Angelicae sinensis radix | Medicinal slices | Beijing City                                  |
| YC0133MT09 | <i>Angelica sinensis</i> | Angelicae sinensis radix | Medicinal slices | Beijing City                                  |
| YC0133MT10 | <i>Angelica sinensis</i> | Angelicae sinensis radix | Medicinal slices | Beijing City                                  |
| YC0133MT11 | <i>Angelica sinensis</i> | Angelicae sinensis radix | Medicinal slices | Beijing City                                  |
| YC0133MT12 | <i>Angelica sinensis</i> | Angelicae sinensis radix | Medicinal slices | Beijing City                                  |
| YC0133MT13 | <i>Angelica sinensis</i> | Angelicae sinensis radix | Medicinal slices | Beijing City                                  |
| YC0133MT14 | <i>Angelica sinensis</i> | Angelicae sinensis radix | Medicinal slices | Beijing City                                  |
| GBDG1      | <i>Angelica sinensis</i> | Angelicae sinensis radix | Whole Radix      | Gansu Province                                |



|               |                           |                             |                  |                                               |
|---------------|---------------------------|-----------------------------|------------------|-----------------------------------------------|
| GBQG9         | <i>Angelica sinensis</i>  | Angelicae sinensis radix    | Whole Radix      | Yunnan Province                               |
| DG41          | <i>Angelica biserrata</i> | Angelicae pubescentis radix | Medicinal slices | Anhui Bozhou Herb Market                      |
| DG42          | <i>Angelica biserrata</i> | Angelicae pubescentis radix | Medicinal slices | Anhui Bozhou Herb Market                      |
| DG43          | <i>Angelica biserrata</i> | Angelicae pubescentis radix | Medicinal slices | Anhui Bozhou Herb Market                      |
| DG44          | <i>Angelica biserrata</i> | Angelicae pubescentis radix | Medicinal slices | Anhui Bozhou Herb Market                      |
| DG45          | <i>Angelica biserrata</i> | Angelicae pubescentis radix | Medicinal slices | Anhui Bozhou Herb Market                      |
| DG46          | <i>Angelica biserrata</i> | Angelicae pubescentis radix | Medicinal slices | Beijing City                                  |
| YC0246MT02    | <i>Angelica biserrata</i> | Angelicae pubescentis radix | Medicinal slices | Hebei Anguo Herb Market                       |
| YC0246MT03    | <i>Angelica biserrata</i> | Angelicae pubescentis radix | Medicinal slices | Hebei Anguo Herb Market                       |
| YC0246MT04    | <i>Angelica biserrata</i> | Angelicae pubescentis radix | Medicinal slices | Hebei Anguo Herb Market                       |
| YC0246MT05    | <i>Angelica biserrata</i> | Angelicae pubescentis radix | Medicinal slices | Beijing City                                  |
| RC_YC0246MT05 | <i>Angelica biserrata</i> | Angelicae pubescentis radix | Medicinal slices | Beijing City                                  |
| YC0246MT06    | <i>Angelica biserrata</i> | Angelicae pubescentis radix | Medicinal slices | Henan Yuzhou Herb Market                      |
| YC0246MT07    | <i>Angelica biserrata</i> | Angelicae pubescentis radix | Medicinal slices | Northwest Agriculture and Forestry University |
| YC0246MT08    | <i>Angelica biserrata</i> | Angelicae pubescentis radix | Medicinal slices | Shaanxi Normal University                     |
| YC0246MT09    | <i>Angelica biserrata</i> | Angelicae pubescentis radix | Original plant   | Chongqing City                                |
| YC0246MT10    | <i>Angelica biserrata</i> | Angelicae pubescentis radix | Original plant   | Chongqing City                                |
| YC0246MT11    | <i>Angelica biserrata</i> | Angelicae pubescentis radix | Original plant   | Chongqing City                                |
| YC0246MT12    | <i>Angelica biserrata</i> | Angelicae pubescentis radix | Original plant   | Chongqing City                                |
| YC0246MT13    | <i>Angelica biserrata</i> | Angelicae pubescentis radix | Original plant   | Shennongjia City, Hubei Province              |
| FDC078        | <i>Angelica biserrata</i> | Angelicae pubescentis radix | Powder           | National Institutes for food and drug Control |
| DH            | <i>Angelica biserrata</i> | Angelicae pubescentis radix | Whole Radix      | Hunan Province                                |
| YC0152MT03    | <i>Angelica dahurica</i>  | Angelicae Dahuricae Radix   | Medicinal slices | Anhui Bozhou Herb Market                      |
| YC0152MT05    | <i>Angelica dahurica</i>  | Angelicae Dahuricae Radix   | Medicinal slices | Anhui Bozhou Herb Market                      |
| YC0152MT06    | <i>Angelica dahurica</i>  | Angelicae Dahuricae Radix   | Original plant   | Nanchuan District, Chongqing City             |
| YC0152MT07    | <i>Angelica dahurica</i>  | Angelicae Dahuricae Radix   | Original plant   | Nanchuan District, Chongqing City             |
| YC0152MT08    | <i>Angelica dahurica</i>  | Angelicae Dahuricae Radix   | Original plant   | Nanchuan District, Chongqing City             |
| YC0152MT09    | <i>Angelica dahurica</i>  | Angelicae Dahuricae Radix   | Medicinal slices | Anhui Bozhou Herb Market                      |
| YC0152MT14    | <i>Angelica dahurica</i>  | Angelicae Dahuricae Radix   | Medicinal slices | Luoyang City, Henan Province                  |
| YC0152MT15    | <i>Angelica dahurica</i>  | Angelicae Dahuricae Radix   | Original plant   | Sipsongpanna, Yunnan Province                 |
| RC_YC0152MT03 | <i>Angelica dahurica</i>  | Angelicae Dahuricae Radix   | Medicinal slices | Anhui Bozhou Herb Market                      |
| RC_YC0152MT14 | <i>Angelica dahurica</i>  | Angelicae Dahuricae Radix   | Medicinal slices | Luoyang City, Henan Province                  |
| JPHF096       | <i>Angelica dahurica</i>  | Angelicae Dahuricae Radix   | Medicinal slices | Tokyo, Japan                                  |

|               |                                                |                           |                  |                                               |
|---------------|------------------------------------------------|---------------------------|------------------|-----------------------------------------------|
| FDC003        | <i>Angelica dahurica</i>                       | Angelicae Dahuricae Radix | Powder           | National Institutes for food and drug Control |
| RC_YC0106MT02 | <i>Angelica dahurica</i> var. <i>formosana</i> | Angelicae Dahuricae Radix | Original plant   | Nanchuan District, Chongqing City             |
| RC_YC0106MT03 | <i>Angelica dahurica</i> var. <i>formosana</i> | Angelicae Dahuricae Radix | Original plant   | Nanchuan District, Chongqing City             |
| YC0106MT03    | <i>Angelica dahurica</i> var. <i>formosana</i> | Angelicae Dahuricae Radix | Original plant   | Nanchuan District, Chongqing City             |
| YC0106MT04    | <i>Angelica dahurica</i> var. <i>formosana</i> | Angelicae Dahuricae Radix | Medicinal slices | Guangzhou Qingping Herb Market                |
| YC0106MT05    | <i>Angelica dahurica</i> var. <i>formosana</i> | Angelicae Dahuricae Radix | Original plant   | Nanchuan District, Chongqing City             |
| YC0106MT06    | <i>Angelica dahurica</i> var. <i>formosana</i> | Angelicae Dahuricae Radix | Original plant   | Nanchuan District, Chongqing City             |
| YC0106MT07    | <i>Angelica dahurica</i> var. <i>formosana</i> | Angelicae Dahuricae Radix | Original plant   | Nanchuan District, Chongqing City             |
| YC0106MT08    | <i>Angelica dahurica</i> var. <i>formosana</i> | Angelicae Dahuricae Radix | Original plant   | Nanning City, Guangxi Province                |
| YC0106MT10    | <i>Angelica dahurica</i> var. <i>formosana</i> | Angelicae Dahuricae Radix | Original plant   | Nanning City, Guangxi Province                |
| YC0106MT11    | <i>Angelica dahurica</i> var. <i>formosana</i> | Angelicae Dahuricae Radix | Original plant   | Chengdu City, Sichuan Province                |
| YC0106MT12    | <i>Angelica dahurica</i> var. <i>formosana</i> | Angelicae Dahuricae Radix | Original plant   | Nanning City, Guangxi Province                |
| YC0106MT13    | <i>Angelica dahurica</i> var. <i>formosana</i> | Angelicae Dahuricae Radix | Medicinal slices | Hangzhou City, Zhejiang Province              |
| ZH1           | <i>Angelica decursiva</i>                      | Angelicae Dahuricae Radix | Whole Radix      | Hunan Province                                |
| ZH2           | <i>Angelica decursiva</i>                      | Angelicae Dahuricae Radix | Whole Radix      | Hunan Province                                |
| YC0449MT02    | <i>Angelica decursiva</i>                      | Peucedani Decursivi Radix | Original plant   | Nanchuan District, Chongqing City             |
| YC0449MT03    | <i>Angelica decursiva</i>                      | Peucedani Decursivi Radix | Medicinal slices | Nanyang City, Henan Province                  |
| YC0449MT04    | <i>Angelica decursiva</i>                      | Peucedani Decursivi Radix | Original plant   | Lushan, Jiangxi Province                      |
| YC0449MT05    | <i>Angelica decursiva</i>                      | Peucedani Decursivi Radix | Original plant   | Lushan, Jiangxi Province                      |
| YC0449MT06    | <i>Angelica decursiva</i>                      | Peucedani Decursivi Radix | Original plant   | Lushan, Jiangxi Province                      |
| YC0449MT07    | <i>Angelica decursiva</i>                      | Peucedani Decursivi Radix | Medicinal slices | Hebei Anguo Herb Market                       |
| YC0449MT08    | <i>Angelica decursiva</i>                      | Peucedani Decursivi Radix | Medicinal slices | Hebei Anguo Herb Market                       |
| YC0449MT09    | <i>Angelica decursiva</i>                      | Peucedani Decursivi Radix | Medicinal slices | Hebei Anguo Herb Market                       |
| YC0449MT10    | <i>Angelica decursiva</i>                      | Peucedani Decursivi Radix | Medicinal slices | Hebei Anguo Herb Market                       |
| YC0449MT11    | <i>Angelica decursiva</i>                      | Peucedani Decursivi Radix | Medicinal slices | Hebei Anguo Herb Market                       |
| YC0449MT12    | <i>Angelica decursiva</i>                      | Peucedani Decursivi Radix | Medicinal slices | Hebei Anguo Herb Market                       |
| YC0449MT13    | <i>Angelica decursiva</i>                      | Peucedani Decursivi Radix | Medicinal slices | Hebei Anguo Herb Market                       |
| YC0449MT14    | <i>Angelica decursiva</i>                      | Peucedani Decursivi Radix | Medicinal slices | Hebei Anguo Herb Market                       |
| YC0449MT15    | <i>Angelica decursiva</i>                      | Peucedani Decursivi Radix | Medicinal slices | Hebei Anguo Herb Market                       |
| PS1226MT04    | <i>Angelica decursiva</i>                      | Peucedani Decursivi Radix | Original plant   | Nanning City, Guangxi Province                |
| PS1226MT05    | <i>Angelica decursiva</i>                      | Peucedani Decursivi Radix | Original plant   | Nanning City, Guangxi Province                |
| SZ_YC0449MT03 | <i>Angelica decursiva</i>                      | Peucedani Decursivi Radix | Medicinal slices | Nanyang City, Henan Province                  |
| RC_YC0449MT12 | <i>Angelica decursiva</i>                      | Peucedani Decursivi Radix | Medicinal slices | Hebei Anguo Herb Market                       |

|            |                               |                            |                  |                                               |
|------------|-------------------------------|----------------------------|------------------|-----------------------------------------------|
| GBXJ1      | <i>Conioselinum vaginatum</i> | -                          | Whole Radix      | Xinjiang Province                             |
| GBXJ2      | <i>Conioselinum vaginatum</i> | -                          | Whole Radix      | Xinjiang Province                             |
| GBXJ3      | <i>Conioselinum vaginatum</i> | -                          | Whole Radix      | Xinjiang Province                             |
| GBTDG1     | <i>Levisticum officinale</i>  | Ligustici rhizoma et radix | Whole Radix      | Beijing City                                  |
| GBTDG2     | <i>Levisticum officinale</i>  | Ligustici rhizoma et radix | Whole Radix      | Beijing City                                  |
| GBTDG3     | <i>Levisticum officinale</i>  | Ligustici rhizoma et radix | Whole Radix      | Beijing City                                  |
| GBTDG4     | <i>Levisticum officinale</i>  | Ligustici rhizoma et radix | Whole Radix      | Beijing City                                  |
| GBTDG5     | <i>Levisticum officinale</i>  | Ligustici rhizoma et radix | Whole Radix      | Beijing City                                  |
| YC0482MT01 | <i>Ligusticum jeholense</i>   | Ligustici rhizoma et radix | Powder           | Liaoning Institute for Food and Drug Control  |
| YC0482MT02 | <i>Ligusticum jeholense</i>   | Ligustici rhizoma et radix | Medicinal slices | Shenyang City, Liaoning Province              |
| YC0482MT03 | <i>Ligusticum jeholense</i>   | Ligustici rhizoma et radix | Medicinal slices | Shenyang City, Liaoning Province              |
| YC0482MT04 | <i>Ligusticum jeholense</i>   | Ligustici rhizoma et radix | Medicinal slices | Shenyang City, Liaoning Province              |
| YC0482MT05 | <i>Ligusticum jeholense</i>   | Ligustici rhizoma et radix | Medicinal slices | Shenyang City, Liaoning Province              |
| YC0482MT06 | <i>Ligusticum jeholense</i>   | Ligustici rhizoma et radix | Medicinal slices | Shenyang City, Liaoning Province              |
| PS1213MT02 | <i>Ligusticum jeholense</i>   | Ligustici rhizoma et radix | Original plant   | Beijing City                                  |
| CBS508MT01 | <i>Ligusticum jeholense</i>   | Ligustici rhizoma et radix | Original plant   | Changbai Mountains                            |
| CBS508MT02 | <i>Ligusticum jeholense</i>   | Ligustici rhizoma et radix | Original plant   | Changbai Mountains                            |
| CBS508MT03 | <i>Ligusticum jeholense</i>   | Ligustici rhizoma et radix | Original plant   | Changbai Mountains                            |
| FDC378     | <i>Ligusticum jeholense</i>   | Ligustici rhizoma et radix | Powder           | National Institutes for food and drug Control |
| GBLGB1     | <i>Ligusticum jeholense</i>   | Ligustici rhizoma et radix | Whole Radix      | Liaoning Proovince                            |
| GBLGB2     | <i>Ligusticum jeholense</i>   | Ligustici rhizoma et radix | Whole Radix      | Liaoning Proovince                            |
| GBLGB3     | <i>Ligusticum jeholense</i>   | Ligustici rhizoma et radix | Whole Radix      | Liaoning Proovince                            |
| GBLGB5     | <i>Ligusticum jeholense</i>   | Ligustici rhizoma et radix | Whole Radix      | Liaoning Proovince                            |
| GBLGB6     | <i>Ligusticum jeholense</i>   | Ligustici rhizoma et radix | Whole Radix      | Liaoning Proovince                            |
| GBLGB7     | <i>Ligusticum jeholense</i>   | Ligustici rhizoma et radix | Whole Radix      | Liaoning Proovince                            |
| GBLGB8     | <i>Ligusticum jeholense</i>   | Ligustici rhizoma et radix | Whole Radix      | Liaoning Proovince                            |
| GBLGB9     | <i>Ligusticum jeholense</i>   | Ligustici rhizoma et radix | Whole Radix      | Liaoning Proovince                            |
| YC0753MT01 | <i>Ligusticum sinense</i>     | Ligustici rhizoma et radix | Medicinal slices | Xi'an City, Shaanxi Province                  |
| YC0753MT02 | <i>Ligusticum sinense</i>     | Ligustici rhizoma et radix | Medicinal slices | Xi'an City, Shaanxi Province                  |
| YC0753MT03 | <i>Ligusticum sinense</i>     | Ligustici rhizoma et radix | Medicinal slices | Xi'an City, Shaanxi Province                  |
| YC0753MT04 | <i>Ligusticum sinense</i>     | Ligustici rhizoma et radix | Medicinal slices | Xi'an City, Shaanxi Province                  |
| YC0753MT05 | <i>Ligusticum sinense</i>     | Ligustici rhizoma et radix | Medicinal slices | Xi'an City, Shaanxi Province                  |

|               |                                 |                               |                  |                                                     |
|---------------|---------------------------------|-------------------------------|------------------|-----------------------------------------------------|
| YC0753MT06    | <i>Ligusticum sinense</i>       | Ligustici rhizoma et radix    | Medicinal slices | Xi'an City, Shaanxi Province                        |
| YC0753MT07    | <i>Ligusticum sinense</i>       | Ligustici rhizoma et radix    | Medicinal slices | Xi'an City, Shaanxi Province                        |
| YC0753MT08    | <i>Ligusticum sinense</i>       | Ligustici rhizoma et radix    | Medicinal slices | Xi'an City, Shaanxi Province                        |
| YC0753MT09    | <i>Ligusticum sinense</i>       | Ligustici rhizoma et radix    | Medicinal slices | Xi'an City, Shaanxi Province                        |
| YC0753MT10    | <i>Ligusticum sinense</i>       | Ligustici rhizoma et radix    | Medicinal slices | Xi'an City, Shaanxi Province                        |
| YC0753MT11    | <i>Ligusticum sinense</i>       | Ligustici rhizoma et radix    | Medicinal slices | Xi'an City, Shaanxi Province                        |
| YC0753MT12    | <i>Ligusticum sinense</i>       | Ligustici rhizoma et radix    | Medicinal slices | Xi'an City, Shaanxi Province                        |
| YC0753MT13    | <i>Ligusticum sinense</i>       | Ligustici rhizoma et radix    | Medicinal slices | Lanzhou City, Gansu Province                        |
| YC0753MT14    | <i>Ligusticum sinense</i>       | Ligustici rhizoma et radix    | Medicinal slices | Lanzhou City, Gansu Province                        |
| YC0753MT15    | <i>Ligusticum sinense</i>       | Ligustici rhizoma et radix    | Medicinal slices | Lanzhou City, Gansu Province                        |
| YC0753MT16    | <i>Ligusticum sinense</i>       | Ligustici rhizoma et radix    | Medicinal slices | Lanzhou City, Gansu Province                        |
| YC0753MT17    | <i>Ligusticum sinense</i>       | Ligustici rhizoma et radix    | Medicinal slices | Lanzhou City, Gansu Province                        |
| YC0753MT18    | <i>Ligusticum sinense</i>       | Ligustici rhizoma et radix    | Medicinal slices | Lanzhou City, Gansu Province                        |
| YC0753MT19    | <i>Ligusticum sinense</i>       | Ligustici rhizoma et radix    | Medicinal slices | Hebei Anguo Herb Market                             |
| FDC377        | <i>Ligusticum sinense</i>       | Ligustici rhizoma et radix    | Powder           | National Institutes for food and drug Control       |
| PS1208MT01    | <i>Ligusticum sinense</i>       | Ligustici rhizoma et radix    | Original plant   | Enshi City, Hubei Province                          |
| PS1215MT10    | <i>Notopterygium franchetii</i> | Notopterygii rhizoma et radix | Medicinal slices | Daofu Country, Sichuan Province                     |
| PS1215MT11    | <i>Notopterygium franchetii</i> | Notopterygii rhizoma et radix | Medicinal slices | Xiaojin Country, Sichuan Province                   |
| PS1215MT12    | <i>Notopterygium franchetii</i> | Notopterygii rhizoma et radix | Medicinal slices | Xiaojin Country, Sichuan Province                   |
| PS1215MT13    | <i>Notopterygium franchetii</i> | Notopterygii rhizoma et radix | Medicinal slices | Xiaojin Country, Sichuan Province                   |
| PS1215MT14    | <i>Notopterygium franchetii</i> | Notopterygii rhizoma et radix | Medicinal slices | Dangchang Country, Gansu Province                   |
| PS1215MT15    | <i>Notopterygium franchetii</i> | Notopterygii rhizoma et radix | Medicinal slices | Weiyuan Country, Gansu Province                     |
| PS1215MT16    | <i>Notopterygium franchetii</i> | Notopterygii rhizoma et radix | Medicinal slices | Kangle Country, Gansu Province                      |
| PS1215MT02    | <i>Notopterygium franchetii</i> | Notopterygii rhizoma et radix | Original plant   | Kangding Country, Sichuan Province                  |
| PS1215MT03    | <i>Notopterygium franchetii</i> | Notopterygii rhizoma et radix | Original plant   | Daofu Country, Sichuan Province                     |
| PS1215MT04    | <i>Notopterygium franchetii</i> | Notopterygii rhizoma et radix | Original plant   | Xiaojin Country, Sichuan Province                   |
| RC_PS1215MT13 | <i>Notopterygium franchetii</i> | Notopterygii rhizoma et radix | Medicinal slices | Xiaojin Country, Sichuan Province                   |
| RC_PS1215MT14 | <i>Notopterygium franchetii</i> | Notopterygii rhizoma et radix | Medicinal slices | Dangchang Country, Gansu Province                   |
| RC_PS1215MT15 | <i>Notopterygium franchetii</i> | Notopterygii rhizoma et radix | Medicinal slices | Weiyuan Country, Gansu Province                     |
| RC_PS1215MT16 | <i>Notopterygium franchetii</i> | Notopterygii rhizoma et radix | Medicinal slices | Kangle Country, Gansu Province                      |
| FDC287        | <i>Notopterygium franchetii</i> | Notopterygii rhizoma et radix | Powder           | National Institutes for food and drug Control       |
| YC0137MT10    | <i>Notopterygium incisum</i>    | Notopterygii rhizoma et radix | Medicinal slices | China Shineway Pharmaceutical Group Ltd.            |
| YC0137MT11    | <i>Notopterygium incisum</i>    | Notopterygii rhizoma et radix | Medicinal slices | Jilin Lincun Chinese Medicine Development Co., Ltd. |

|               |                              |                               |                  |                                                    |
|---------------|------------------------------|-------------------------------|------------------|----------------------------------------------------|
| PS2005MT10    | <i>Notopterygium incisum</i> | Notopterygii rhizoma et radix | Medicinal slices | Rangtang Country, Sichuan Province                 |
| PS2005MT11    | <i>Notopterygium incisum</i> | Notopterygii rhizoma et radix | Medicinal slices | Chengdu Hehuachi Medicine Market, Sichuan Province |
| PS2005MT12    | <i>Notopterygium incisum</i> | Notopterygii rhizoma et radix | Medicinal slices | Xiaojin Country, Sichuan Province                  |
| PS2005MT13    | <i>Notopterygium incisum</i> | Notopterygii rhizoma et radix | Medicinal slices | Xiaojin Country, Sichuan Province                  |
| PS2005MT14    | <i>Notopterygium incisum</i> | Notopterygii rhizoma et radix | Medicinal slices | Xiaojin Country, Sichuan Province                  |
| PS2005MT15    | <i>Notopterygium incisum</i> | Notopterygii rhizoma et radix | Medicinal slices | Jinchuan Country, Sichuan Province                 |
| PS2005MT16    | <i>Notopterygium incisum</i> | Notopterygii rhizoma et radix | Medicinal slices | Jinchuan Country, Sichuan Province                 |
| PS2005MT17    | <i>Notopterygium incisum</i> | Notopterygii rhizoma et radix | Medicinal slices | Heishui Country, Sichuan Province                  |
| PS2005MT18    | <i>Notopterygium incisum</i> | Notopterygii rhizoma et radix | Medicinal slices | Kangding Medicine Market                           |
| PS2005MT19    | <i>Notopterygium incisum</i> | Notopterygii rhizoma et radix | Medicinal slices | Kangding Country, Sichuan Province                 |
| PS2005MT20    | <i>Notopterygium incisum</i> | Notopterygii rhizoma et radix | Medicinal slices | Banma Country, Qinghai Province                    |
| PS2005MT21    | <i>Notopterygium incisum</i> | Notopterygii rhizoma et radix | Medicinal slices | Banma Country, Qinghai Province                    |
| PS2005MT22    | <i>Notopterygium incisum</i> | Notopterygii rhizoma et radix | Medicinal slices | Banma Country, Qinghai Province                    |
| PS2005MT23    | <i>Notopterygium incisum</i> | Notopterygii rhizoma et radix | Medicinal slices | Banma Country, Qinghai Province                    |
| PS2005MT24    | <i>Notopterygium incisum</i> | Notopterygii rhizoma et radix | Medicinal slices | Banma Country, Qinghai Province                    |
| PS2005MT25    | <i>Notopterygium incisum</i> | Notopterygii rhizoma et radix | Medicinal slices | Banma Country, Qinghai Province                    |
| PS2005MT26    | <i>Notopterygium incisum</i> | Notopterygii rhizoma et radix | Medicinal slices | Banma Country, Qinghai Province                    |
| PS2005MT27    | <i>Notopterygium incisum</i> | Notopterygii rhizoma et radix | Medicinal slices | Gande Country, Qinghai Province                    |
| PS2005MT28    | <i>Notopterygium incisum</i> | Notopterygii rhizoma et radix | Medicinal slices | Jiuzhi Country, Qinghai Province                   |
| PS2005MT29    | <i>Notopterygium incisum</i> | Notopterygii rhizoma et radix | Medicinal slices | Jiuzhi Country, Qinghai Province                   |
| PS2005MT30    | <i>Notopterygium incisum</i> | Notopterygii rhizoma et radix | Medicinal slices | Menyuan Country, Qinghai Province                  |
| PS2005MT31    | <i>Notopterygium incisum</i> | Notopterygii rhizoma et radix | Medicinal slices | Dari Country, Qinghai Province                     |
| PS2005MT32    | <i>Notopterygium incisum</i> | Notopterygii rhizoma et radix | Medicinal slices | Dawu Country, Qinghai Province                     |
| PS2005MT33    | <i>Notopterygium incisum</i> | Notopterygii rhizoma et radix | Medicinal slices | Dawu Country, Qinghai Province                     |
| PS2005MT01    | <i>Notopterygium incisum</i> | Notopterygii rhizoma et radix | Original plant   | Kangding Country, Sichuan Province                 |
| PS2005MT02    | <i>Notopterygium incisum</i> | Notopterygii rhizoma et radix | Original plant   | Daofu Country, Sichuan Province                    |
| PS2005MT03    | <i>Notopterygium incisum</i> | Notopterygii rhizoma et radix | Original plant   | Kangding Country, Sichuan Province                 |
| RC_PS2005MT10 | <i>Notopterygium incisum</i> | Notopterygii rhizoma et radix | Medicinal slices | Rangtang Country, Sichuan Province                 |
| RC_PS2005MT11 | <i>Notopterygium incisum</i> | Notopterygii rhizoma et radix | Medicinal slices | Chengdu Hehuachi Medicine Market, Sichuan Province |
| RC_PS2005MT15 | <i>Notopterygium incisum</i> | Notopterygii rhizoma et radix | Medicinal slices | Jinchuan Country, Sichuan Province                 |
| RC_PS2005MT20 | <i>Notopterygium incisum</i> | Notopterygii rhizoma et radix | Medicinal slices | Banma Country, Qinghai Province                    |
| RC_PS2005MT27 | <i>Notopterygium incisum</i> | Notopterygii rhizoma et radix | Medicinal slices | Gande Country, Qinghai Province                    |
| RC_PS2005MT28 | <i>Notopterygium incisum</i> | Notopterygii rhizoma et radix | Medicinal slices | Jiuzhi Country, Qinghai Province                   |



|               |                                |                               |                  |                                               |
|---------------|--------------------------------|-------------------------------|------------------|-----------------------------------------------|
| RC_PS2005MT29 | <i>Notopterygium incisum</i>   | Notopterygii rhizoma et radix | Medicinal slices | Jiuzhi Country, Qinghai Province              |
| RC_PS2005MT30 | <i>Notopterygium incisum</i>   | Notopterygii rhizoma et radix | Medicinal slices | Menyuan Country, Qinghai Province             |
| RC_PS2005MT32 | <i>Notopterygium incisum</i>   | Notopterygii rhizoma et radix | Medicinal slices | Dawu Country, Qinghai Province                |
| FDC286        | <i>Notopterygium incisum</i>   | Notopterygii rhizoma et radix | Powder           | National Institutes for food and drug Control |
| GBXG1         | <i>Seselopsis tianschanica</i> | –                             | Whole Radix      | Yunnan Province                               |
| GBXG2         | <i>Seselopsis tianschanica</i> | –                             | Whole Radix      | Yunnan Province                               |
| GBXG3         | <i>Seselopsis tianschanica</i> | –                             | Whole Radix      | Yunnan Province                               |
| GBXG4         | <i>Seselopsis tianschanica</i> | –                             | Whole Radix      | Yunnan Province                               |
| GBXG5         | <i>Seselopsis tianschanica</i> | –                             | Whole Radix      | Yunnan Province                               |
| GBXG6         | <i>Seselopsis tianschanica</i> | –                             | Whole Radix      | Yunnan Province                               |
| GBXG7         | <i>Seselopsis tianschanica</i> | –                             | Whole Radix      | Yunnan Province                               |
| GBXG8         | <i>Seselopsis tianschanica</i> | –                             | Whole Radix      | Yunnan Province                               |

Note: The sequences have been submitted to TCM DNA Barcode Database (<http://www.tcmbarcode.cn/>)

Supplementary Table S2 Accession numbers of GenBank databases

| Latin Name of Original Species                           | GenBank Accession No.                                                                                                                                                                                                                                                    |
|----------------------------------------------------------|--------------------------------------------------------------------------------------------------------------------------------------------------------------------------------------------------------------------------------------------------------------------------|
| <i>Angelica acutiloba</i>                                | AB569093 AB697591 AB697592 AB697593 AB697594 AB697595 AB697596 AB697597 AB697598 AB697599<br>AB697600 AB697601 AB697602 AF169263 AH008024 AJ131291 AY548227 DQ278165 GU395147                                                                                            |
| <i>Angelica acutiloba</i> var. <i>iwatensis</i>          | AB697606 AB697607                                                                                                                                                                                                                                                        |
| <i>Angelica acutiloba</i> var. <i>sugiyamae</i>          | AB697603 AB697604 AB697605                                                                                                                                                                                                                                               |
| <i>Angelica ampla</i>                                    | AH006065 U79598                                                                                                                                                                                                                                                          |
| <i>Angelica amurensis</i>                                | DQ263581 GU395148                                                                                                                                                                                                                                                        |
| <i>Angelica anomala</i>                                  | DQ263582 GU395149 HQ699461 JX022893                                                                                                                                                                                                                                      |
| <i>Angelica apaensis</i>                                 | DQ263583 EU001364 EU418373 EU418381 FJ986045 GU395150 HQ686375 HQ686388 JN107553 JX022894<br>JX022895 JX022896 JX022897 JX022898                                                                                                                                         |
| <i>Angelica archangelica</i>                             | AH003539 EF590754 U30576 U30577                                                                                                                                                                                                                                          |
| <i>Angelica arguta</i>                                   | AH006066 KF619605 U79600                                                                                                                                                                                                                                                 |
| <i>Angelica baizhioides</i>                              | DQ263588                                                                                                                                                                                                                                                                 |
| <i>Angelica balangshanensis</i>                          | HQ896671                                                                                                                                                                                                                                                                 |
| <i>Angelica biserrata</i>                                | DQ270207 GU395180 JX022899 JX022900 KC812810 KJ999417 KJ999418 KJ999419 KJ999420 KJ999421<br>KJ999422 KJ999436 KJ999502                                                                                                                                                  |
| <i>Angelica brevicaulis</i>                              | GU395170                                                                                                                                                                                                                                                                 |
| <i>Angelica breweri</i>                                  | U78456                                                                                                                                                                                                                                                                   |
| <i>Angelica capitellata</i>                              | AF009079 KF619735                                                                                                                                                                                                                                                        |
| <i>Angelica cartilaginomarginata</i>                     | JN603207 JN603208 JN603209 JX022901                                                                                                                                                                                                                                      |
| <i>Angelica cartilaginomarginata</i> var. <i>distans</i> | AY548222                                                                                                                                                                                                                                                                 |
| <i>Angelica cartilaginomarginata</i> var. <i>foliosa</i> | DQ263589 GU395177 JX022906                                                                                                                                                                                                                                               |
| <i>Angelica cincta</i>                                   | AF009080                                                                                                                                                                                                                                                                 |
| <i>Angelica czernaevia</i>                               | DQ270197 GQ379262 GU395173 JN603210 JN603211                                                                                                                                                                                                                             |
| <i>Angelica dabashanensis</i>                            | HQ896670                                                                                                                                                                                                                                                                 |
| <i>Angelica dahurica</i>                                 | AB569095 AF169269 AF169271 AH008027 AH008028 AJ131292 AY925162 DQ278167 EF590755 EU418374<br>EU591997 FJ980394 GQ434688 GQ434689 GU395151 GU395152 JN603212 JN603213 JN603214 JX022902<br>JX022903 JX022904 JX022905 JX022907 JX022908 JX022909 JX022940 KP058313 U78476 |
| <i>Angelica dahurica</i> var. <i>formosana</i>           | GQ434696 JX022910                                                                                                                                                                                                                                                        |
| <i>Angelica decurrens</i>                                | AF009078 FJ385033 GU395171                                                                                                                                                                                                                                               |

|                                               |                                                                                                                                                                                                                                                                                                                                                                                                                             |
|-----------------------------------------------|-----------------------------------------------------------------------------------------------------------------------------------------------------------------------------------------------------------------------------------------------------------------------------------------------------------------------------------------------------------------------------------------------------------------------------|
| <i>Angelica decursiva</i>                     | AJ131293 AY548220 DQ132872 DQ263563 DQ263574 DQ263579 EU418375 EU515308 EU592007 EU592012 GQ434705 GQ434706 GU395153 JN603215 JN603216 JN603217 JX022911 JX022912 KF806563 KF806564 KF806565 KF806566 KJ680236 KJ680237 KJ680238 KJ680239 KJ680240 KJ680241 KJ999480 KJ999543 KJ999544 KP334162 KP334163 KP334164 KP334165 KP334166 KP334167 KP334168 KP334169 KP334170 KP334171 KP334172 KP334173 KP334174 KP334175 U78471 |
| <i>Angelica decursiva</i> f. <i>albiflora</i> | HQ256684                                                                                                                                                                                                                                                                                                                                                                                                                    |
| <i>Angelica dielsii</i>                       | GU395154                                                                                                                                                                                                                                                                                                                                                                                                                    |
| <i>Angelica duclouxii</i>                     | GU395155                                                                                                                                                                                                                                                                                                                                                                                                                    |
| <i>Angelica fargesii</i>                      | EU418376 GU395181                                                                                                                                                                                                                                                                                                                                                                                                           |
| <i>Angelica furcijuga</i>                     | DQ278164 LC035465                                                                                                                                                                                                                                                                                                                                                                                                           |
| <i>Angelica genuflexa</i>                     | DQ263566                                                                                                                                                                                                                                                                                                                                                                                                                    |
| <i>Angelica gigas</i>                         | AJ131290 DQ263575 DQ263580 GU395156 JN603218 JX022913 KM051435                                                                                                                                                                                                                                                                                                                                                              |
| <i>Angelica grayi</i>                         | AY146825 AY146891                                                                                                                                                                                                                                                                                                                                                                                                           |
| <i>Angelica hirsutiflora</i>                  | HQ256683                                                                                                                                                                                                                                                                                                                                                                                                                    |
| <i>Angelica japonica</i>                      | AY548214 DQ278166 JN603219                                                                                                                                                                                                                                                                                                                                                                                                  |
| <i>Angelica kangdingensis</i>                 | DQ263584 GU395157 JX022914 JX022915 JX022916 JX022917                                                                                                                                                                                                                                                                                                                                                                       |
| <i>Angelica keiskei</i>                       | DQ263561 DQ263562 GU395158                                                                                                                                                                                                                                                                                                                                                                                                  |
| <i>Angelica laxifoliata</i>                   | DQ263586 EU647210 FJ196889 FJ196890 FJ196891 FJ196892 FJ228464 FJ228466 FJ228468 FJ228469 GU395159 JN107554 JX022918 JX022919 JX022920                                                                                                                                                                                                                                                                                      |
| <i>Angelica lignescens</i>                    | AY179030 HQ202011 HQ202012 HQ202013 HQ202014 HQ202015 HQ202016 HQ202017 HQ202018 HQ202019 HQ202020 HQ202021 HQ202022 HQ202023 HQ202024 HQ202025 HQ202026 HQ202027 HQ202028 HQ202029 HQ202030 HQ202031 HQ202032 HQ202033 HQ202034 HQ202035 JF262140                                                                                                                                                                          |
| <i>Angelica likiangensis</i>                  | DQ263587 EU684752 HQ267716 JX022921                                                                                                                                                                                                                                                                                                                                                                                         |
| <i>Angelica longicaudata</i>                  | GU395160                                                                                                                                                                                                                                                                                                                                                                                                                    |
| <i>Angelica longipes</i>                      | HQ256679                                                                                                                                                                                                                                                                                                                                                                                                                    |
| <i>Angelica lucida</i>                        | DQ270196                                                                                                                                                                                                                                                                                                                                                                                                                    |
| <i>Angelica maowenensis</i>                   | DQ263585 EU236157 GU395161 JX022922 JX022923 JX022924                                                                                                                                                                                                                                                                                                                                                                       |
| <i>Angelica megaphylla</i>                    | DQ263568 EU418377 GU395162 JX022934 JX022935                                                                                                                                                                                                                                                                                                                                                                                |
| <i>Angelica morii</i>                         | DQ263573 DQ263578 GU395182 JX022925 JX022926                                                                                                                                                                                                                                                                                                                                                                                |
| <i>Angelica nitida</i>                        | DQ263592 EU418378 FJ196887 FJ196888 FJ228465 FJ228467 FJ986041 GU395163 JN107555 JX022927                                                                                                                                                                                                                                                                                                                                   |
| <i>Angelica omeiensis</i>                     | DQ263571 DQ263576 GU395164 JX022928                                                                                                                                                                                                                                                                                                                                                                                         |
| <i>Angelica oncosepala</i>                    | EU418382                                                                                                                                                                                                                                                                                                                                                                                                                    |

|                                         |                                                                                                                                                                                                                                                                                                                                                                                                                                                                                                                                                                                                                                                                                                                                                                                                                                                 |
|-----------------------------------------|-------------------------------------------------------------------------------------------------------------------------------------------------------------------------------------------------------------------------------------------------------------------------------------------------------------------------------------------------------------------------------------------------------------------------------------------------------------------------------------------------------------------------------------------------------------------------------------------------------------------------------------------------------------------------------------------------------------------------------------------------------------------------------------------------------------------------------------------------|
| <i>Angelica paeoniifolia</i>            | FJ237533 HQ256678                                                                                                                                                                                                                                                                                                                                                                                                                                                                                                                                                                                                                                                                                                                                                                                                                               |
| <i>Angelica pinnata</i>                 | AF358532                                                                                                                                                                                                                                                                                                                                                                                                                                                                                                                                                                                                                                                                                                                                                                                                                                        |
| <i>Angelica polymorpha</i>              | DQ263590 GU395165 GU395179 HQ256680 JN603220 JN603221 JN603222 JN603223 JN603224 JN603225<br>JX022929 KF806567 U78475                                                                                                                                                                                                                                                                                                                                                                                                                                                                                                                                                                                                                                                                                                                           |
| <i>Angelica porphyrocaulis</i>          | JX022930                                                                                                                                                                                                                                                                                                                                                                                                                                                                                                                                                                                                                                                                                                                                                                                                                                        |
| <i>Angelica pseudoselinum</i>           | EU236158 EU418379 FJ986042 GU395166 JX022931 JX022932 JX022933                                                                                                                                                                                                                                                                                                                                                                                                                                                                                                                                                                                                                                                                                                                                                                                  |
| <i>Angelica pubescens</i>               | AY925163 DQ263567                                                                                                                                                                                                                                                                                                                                                                                                                                                                                                                                                                                                                                                                                                                                                                                                                               |
| <i>Angelica purpurascens</i>            | AF009090                                                                                                                                                                                                                                                                                                                                                                                                                                                                                                                                                                                                                                                                                                                                                                                                                                        |
| <i>Angelica purpureifolia</i>           | AY548229                                                                                                                                                                                                                                                                                                                                                                                                                                                                                                                                                                                                                                                                                                                                                                                                                                        |
| <i>Angelica roseana</i>                 | AF358533                                                                                                                                                                                                                                                                                                                                                                                                                                                                                                                                                                                                                                                                                                                                                                                                                                        |
| <i>Angelica sachalinensis</i>           | AF077873 DQ263564 U78473                                                                                                                                                                                                                                                                                                                                                                                                                                                                                                                                                                                                                                                                                                                                                                                                                        |
| <i>Angelica saxatilis</i>               | DQ270195 GU395172                                                                                                                                                                                                                                                                                                                                                                                                                                                                                                                                                                                                                                                                                                                                                                                                                               |
| <i>Angelica shikokiana</i>              | AB697610 AB697611 HQ256682 LC035466                                                                                                                                                                                                                                                                                                                                                                                                                                                                                                                                                                                                                                                                                                                                                                                                             |
| <i>Angelica sinensis</i>                | AF393784 AY140231 AY277247 DQ263570 EU591999 FJ204235 FJ572042 GQ434694 GU289653 GU289654<br>GU289655 GU289656 GU289657 GU289658 GU395144 JX022936 JX138965 KC295064 KC295071 KF725039<br>KJ999423 KJ999424 KJ999425 KJ999426 KJ999427 KJ999428 KJ999429 KJ999430 KJ999431 KJ999432<br>KJ999433 KJ999434 KJ999435 KJ999443 KJ999444 KJ999445 KJ999446 KJ999447 KJ999448 KJ999449<br>KJ999450 KJ999451 KJ999452 KJ999453 KJ999454 KJ999455 KJ999456 KJ999457 KJ999458 KJ999481<br>KJ999482 KJ999483 KJ999484 KJ999485 KJ999486 KJ999487 KJ999488 KJ999489 KJ999490 KJ999491<br>KJ999492 KJ999493 KJ999494 KJ999495 KJ999496 KJ999497 KJ999498 KJ999499 KJ999500 KJ999501<br>KJ999511 KJ999512 KJ999513 KJ999514 KJ999515 KJ999516 KJ999517 KJ999518 KJ999519 KJ999520<br>KJ999521 KJ999522 KJ999523 KJ999524 KJ999525 KJ999526 KP334176 KP334177 |
| <i>Angelica songpanensis</i>            | GU395167                                                                                                                                                                                                                                                                                                                                                                                                                                                                                                                                                                                                                                                                                                                                                                                                                                        |
| <i>Angelica sp.</i>                     | DQ263593 DQ263591 JN603226 JN603227 JN603228 JN603229 JN603230                                                                                                                                                                                                                                                                                                                                                                                                                                                                                                                                                                                                                                                                                                                                                                                  |
| <i>Angelica stenoloba</i>               | AB697608                                                                                                                                                                                                                                                                                                                                                                                                                                                                                                                                                                                                                                                                                                                                                                                                                                        |
| <i>Angelica stenoloba f. lanceolata</i> | AB697609                                                                                                                                                                                                                                                                                                                                                                                                                                                                                                                                                                                                                                                                                                                                                                                                                                        |
| <i>Angelica sylvestris</i>              | HQ256681 KP682411 U78474                                                                                                                                                                                                                                                                                                                                                                                                                                                                                                                                                                                                                                                                                                                                                                                                                        |
| <i>Angelica tatianae</i>                | AF009089                                                                                                                                                                                                                                                                                                                                                                                                                                                                                                                                                                                                                                                                                                                                                                                                                                        |
| <i>Angelica tianmuensis</i>             | DQ270194 GU395178 JX022937                                                                                                                                                                                                                                                                                                                                                                                                                                                                                                                                                                                                                                                                                                                                                                                                                      |
| <i>Angelica tsinlingensis</i>           | DQ263572 DQ263577 GU395168 JX022938                                                                                                                                                                                                                                                                                                                                                                                                                                                                                                                                                                                                                                                                                                                                                                                                             |
| <i>Angelica ursina</i>                  | DQ263565                                                                                                                                                                                                                                                                                                                                                                                                                                                                                                                                                                                                                                                                                                                                                                                                                                        |
| <i>Angelica valida</i>                  | DQ263569 EU418380 GU395169 JX022939                                                                                                                                                                                                                                                                                                                                                                                                                                                                                                                                                                                                                                                                                                                                                                                                             |
